# Supplementary material for: A 2-oxoglutarate-dependent dioxygenase converts dihydrofuran to furan in Salvia diterpenoids
Source: PubMed Central journal article supplement — Plant Physiol. 2021 Dec 6;188(3):1496–506. doi: 10.1093/plphys/kiab567 (PMC8896610; doi:10.1093/plphys/kiab567), 2021-12-06
Supplement: kiab567_supplementary_data.pdf [file kiab567_supplementary_data.pdf]

## Supplemental Data

### A 2-oxoglutarate dependent dioxygenase converts dihydrofuran to furan in *Salvia* diterpenoids

Jiao-Jiao Song<sup>1,3,†</sup>, Xin Fang<sup>4, †</sup>, Chen-Yi Li<sup>2</sup>, Yan Jiang<sup>1,5</sup>, Jian-Xu Li<sup>2</sup>, Sheng Wu<sup>1,7</sup>, Juan Guo<sup>6</sup>, Yan Liu<sup>1,3</sup>, Hang Fan<sup>1</sup>, Yan-Bo Huang<sup>1</sup>, Yu-Kun Wei<sup>1</sup>, Yu Kong<sup>1</sup>, Qing Zhao<sup>1</sup>, Jing-Jing Xu<sup>1</sup>, Yong-Hong Hu<sup>1</sup>, Xiao-Ya Chen<sup>1,2</sup>, Lei Yang<sup>1\*</sup>

**Supplemental Figure S1.** Aerial parts and roots of *S. miltiorrhiza* and *S. substolonifera*.

**Supplemental Figure S2.** UPLC profiles of enzyme activity of SmT II AS *in vitro*.

**Supplemental Figure S3.** Effect of temperature and pH on enzyme activities of SmT II AS using CT as substrate.

**Supplemental Figure S4.** Characterization of SmT II AS activities by *in vitro* assay.

**Supplemental Figure S5.** The metabolites altered in accumulation in SmT II AS-RANi lines.

**Supplemental Figure S6.** The relative content of tanshinone II A in *S. miltiorrhiza*, *S. meiliensis*, *S. bowleyana* and *S. trijuga*, respectively.

**Supplemental Figure S7.** Extended phylogenetic analysis of T II ASs and Sm2-ODDs with other experimentally characterized 2-ODDs.

**Supplemental Table S1** The annotation ratio statistics of *S. miltiorrhiza* and *S. substolonifera* transcriptome database.

**Supplemental Table S2** The sequences of 18 *Sm2-ODD* candidate genes and the homologs from Xu and Song (2017).

**Supplemental Table S3** Protein sequences information for the phylogenetic tree.

**Supplemental Table S4** List of oligonucleotide primer sequences.

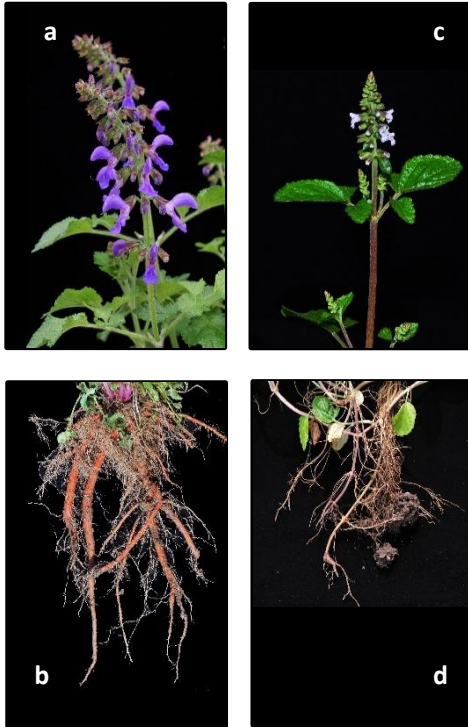

**Supplemental Figure S1.** Aerial parts and roots of *S. miltiorrhiza* and *S. substolonifera*. (a) *S. miltiorrhiza* aerial part. (b) *S. miltiorrhiza* root. (c) *S. substolonifera* aerial part. (d) *S. substolonifera* root.

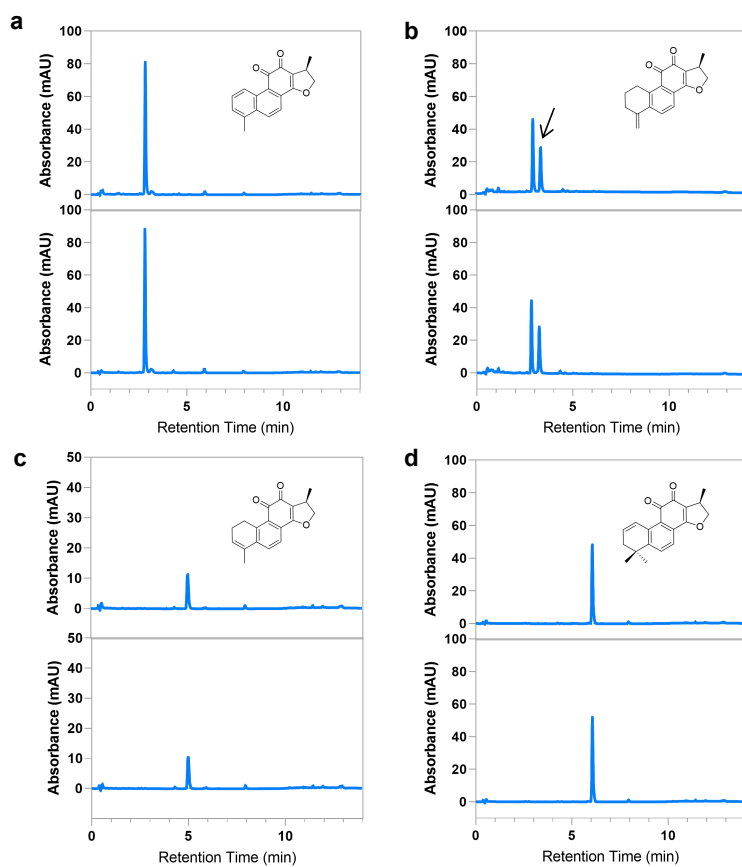

**Supplemental Figure S2** UPLC profiles of enzyme activity of SmTHIAS *in vitro*. The assays were performed using 15,16-dihydrotanshinone I (a) , methylenedihydrotanshinquinone (b) , tetrahydrotanshinone I (c) and 1,2-dihydrocryptotanshinon (d) as substrates, respectively.

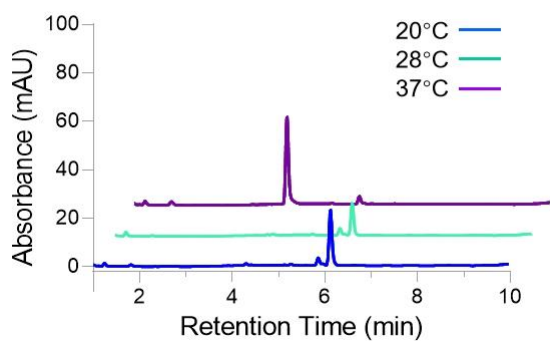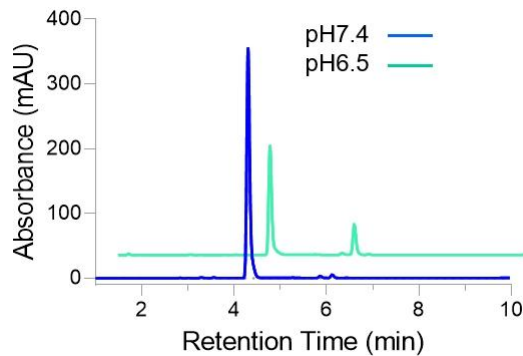

**Supplemental Figure S3** Effect of temperature and pH on enzyme activities of SmTIIAS using CT as substrate. (a) The assays were carried out on different temperature of 20°C, 28°C and 37°C, respectively. (b) The reactions under the pH of 6.5 and 7.4 were compared with the substrate cryptotanshinone.

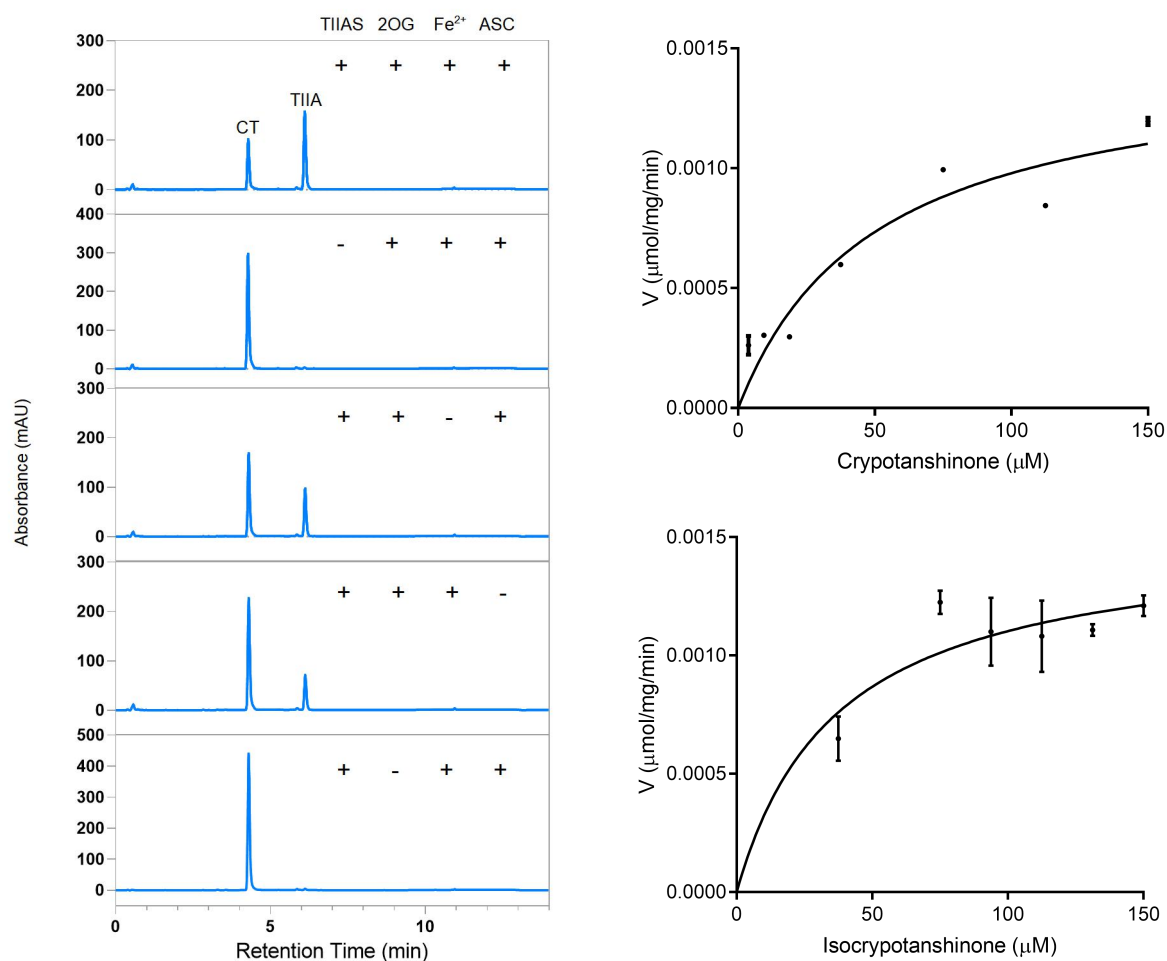

**Supplemental Figure S4** Characterization of SmTIIAS activities by *in vitro* assay. (a) UPLC profiles of the catalytic products by SmTIIAS *in vitro*. The effect of 2OG, Fe<sup>2+</sup> and ASC on the reaction were depicted. (b) Michaelis-Menten kinetic characterization of SmTIIAS with CT as substrate. (c) Michaelis-Menten kinetic characterization of SmTIIAS with iCT as substrate. The values represent means  $\pm$  SE of three replicates.

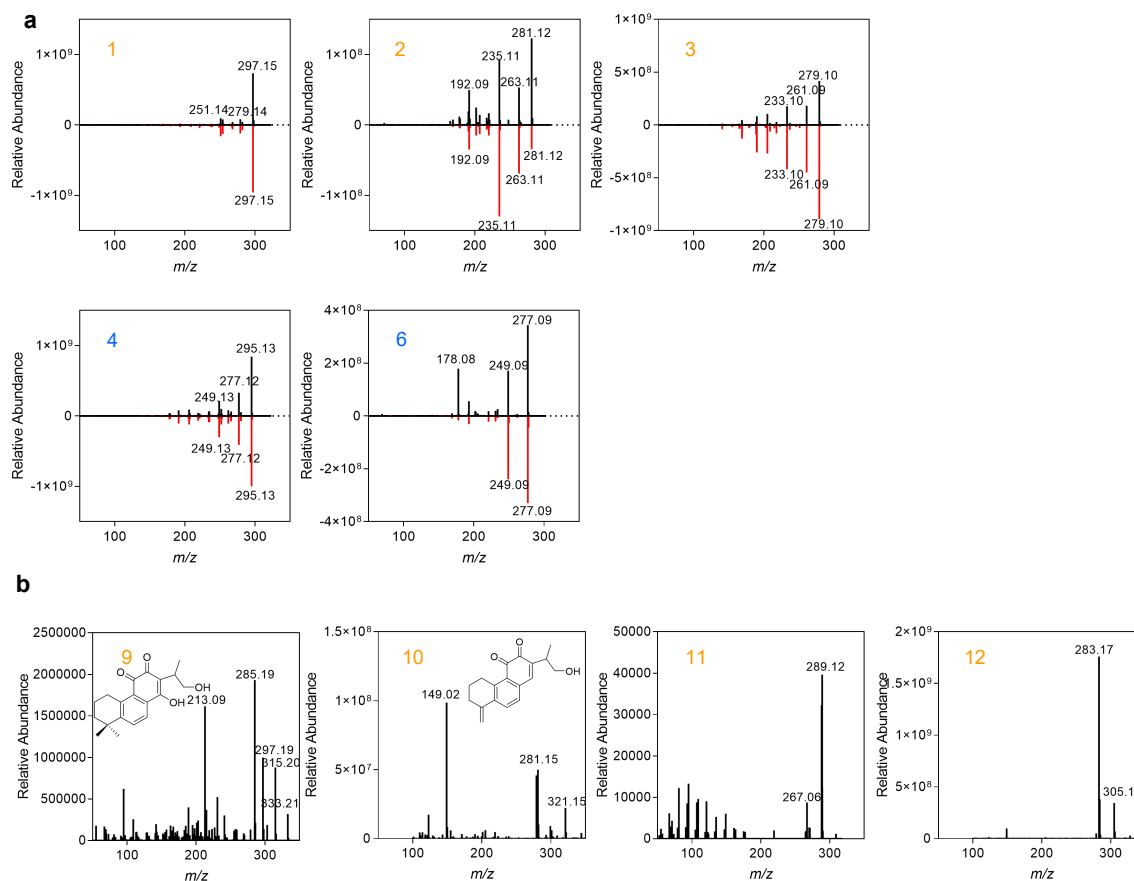

**Supplemental Figure S5** The metabolites altered in accumulation in SmTIAS-RANi lines. (a) The mass spectra for the compounds 1, 2, 3, 4, 6 (colored in black) and the authentic standards (colored in red) of cryptotanshinone, methylenedihydrotanshinquinone, 15,16-dihydrotanshinone I, tanshinone IIA, tanshinone I, respectively. (b) The mass spectra of unknown compounds. 9 and 10 were speculated to be neocryptotanshinone and 16-hydroxy-4-methylenemiltirone.

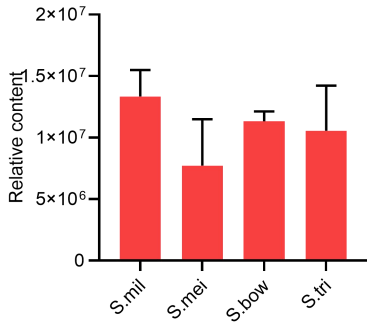

**Supplemental Figure S6** The relative content of tanshinone IIA in *S. miltiorrhiza*, *S. meliensis*, *S. bowleyana* and *S. trijuga*, respectively. Data represent the mean  $\pm$  SD of three replicates.

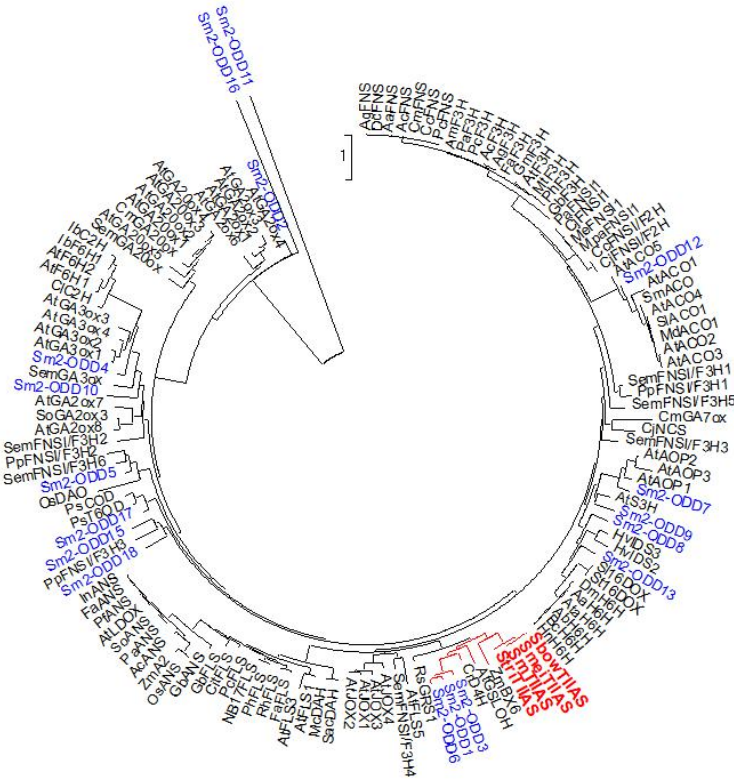

**Supplemental Figure S7** Extended phylogenetic analysis of TIAs and Sm2-ODDs with other experimentally characterized 2-ODDs. The phylogenetic tree is inferred by Maximum-likelihood method. Bootstrap statistics (1,000 replicates) are indicated at the tree nodes. The tree is drawn to scale, with branch lengths measured in the number of substitutions per site.



**Supplemental Table S1** The annotation ratio statistics of *S. miltiorrhiza* and *S. substolonifera* transcriptome database.

|                          | Database           | NR     | SWISSPROT | KOG    | KEGG   | GO     |
|--------------------------|--------------------|--------|-----------|--------|--------|--------|
| <i>S. miltiorrhiza</i>   | Annotation_numbers | 66,511 | 50,118    | 42,020 | 16,931 | 45,753 |
|                          | Annotation_ratio   | 58.94% | 44.41%    | 37.24% | 15.00% | 40.54% |
| <i>S. substolonifera</i> | Annotation_numbers | 47,174 | 38,307    | 32,565 | 13,268 | 34,274 |
|                          | Annotation_ratio   | 52.37% | 42.53%    | 36.15% | 14.73% | 38.05% |

**Supplemental Table S2** The sequences of 18 *Sm2-ODD* candidate genes and the homolog from Xu and Song (2017).

| 2-ODD    | Homolog and percent identity | Sequence                                                                                                                                                                                                                                                                                                                                                                                                                                                                                                                                                                                                                                                                                                                                                                                                                                                                                                                                                                                                                                                                                                                                                                                                                                                                                                                                                                                                                                                                                                                                                                                       |
|----------|------------------------------|------------------------------------------------------------------------------------------------------------------------------------------------------------------------------------------------------------------------------------------------------------------------------------------------------------------------------------------------------------------------------------------------------------------------------------------------------------------------------------------------------------------------------------------------------------------------------------------------------------------------------------------------------------------------------------------------------------------------------------------------------------------------------------------------------------------------------------------------------------------------------------------------------------------------------------------------------------------------------------------------------------------------------------------------------------------------------------------------------------------------------------------------------------------------------------------------------------------------------------------------------------------------------------------------------------------------------------------------------------------------------------------------------------------------------------------------------------------------------------------------------------------------------------------------------------------------------------------------|
| Sm2-ODD1 | SMil_000<br>18082<br>99.45%  | <p>ATGGCGAATTGTAGCAATGGCGATTTTCGATTGGGGTAGAG<br/>           CAGTTGAAGAGTTCAGCGAGATGAAAACCGGCGTGAAGG<br/>           GTCTGATGGACGCCGGAGTGACGGAGCTACCGCGTCTGT<br/>           TCGTTCATCCACCGGAGGATCTGCAGAGCCATCCGCCCC<br/>           ACGGCGGACAGCTGGAGCTGCCGACAATAGACCTAGACG<br/>           GGGCGGAGCGCGGAGGGCGCACGGCGGAGGGAGGTGGT<br/>           GGAGCAGATGGGCAAGGCGGCCGCGAGAGTGGGGTTCT<br/>           TCCGCATCGTGAACCACGGGATCCCGGCGGGAGAAATGG<br/>           ACGGCATGTTGGAGGCGGTGAAGCGATTCCACGAGCTCC<br/>           CGGCGGAGGAGAAGCTGGCTTTCTACGCGCCGGCGCAC<br/>           GACCCCCGGCCGGTGAAGCTGAACAGCAACCTCCCCGTG<br/>           AGGGAGAAGGATCCGGCCAGTTGGAGGGACGTGGTGAC<br/>           GTGCGTGTTTACAGAGACGATCAACTGGAGGCGCAACTCAT<br/>           ACCTTCAGCCCTGAGGAAGGAAATGCTGGATTATGTCAAG<br/>           TACATGATGGGACTGAGGGGGCTGATGAACGAGTTACTCT<br/>           CCGAAGCCCTAGGGCTCCCCACCGACTACCTATCCAATCT<br/>           GGAGTGCATGAGAAGCCAGTCGCTGGCATGTTGGTATTAT<br/>           CCGGTTTGTCCAGAGCCAAACAAGACCTTAGCCTCACCCA<br/>           CCCATTCCGACTTGACATTCCTGACGCTGCTCATGCAAGA<br/>           CACCACCGGCGGCCTCCAGATCCTCCGCGACGATCAGTG<br/>           GTTCGATGTGACGCCGTTTCGCGGGGCCCTCATCGCCAA<br/>           CATTGCGGATCTGATGCAGATTATAAGCAATGGCAAGTTC<br/>           ATAAGCGTGCGGCACAGAGTGCGGGCGCAGGCGGTGGG<br/>           GCCCAGGATATCGGTGGCGTGCTTCTTCGGTCCGAGCGT<br/>           CAGAGCTACGAGCAAGGCGTTCGGTCCCATAAAAGAGCT<br/>           CCTTTCCGACGAGAGTGGGCCAGATACAGAGAGGTTAC<br/>           CCTTCTTCAATACCTCAGCAGGTACAAGAGCAAAGGCGAG<br/>           CGAGTTGCCTCCGCCTTGCATTATTACCAGATATAA</p> |
| Sm2-ODD2 | SMil_000<br>28460<br>99.68%  | <p>ATGGTTGTGATATCTCAAATCCAACCATGAAAATGGAGAA<br/>           AATACGAGACGACATTGAGCTTCCAATCATAAACCTCTGC<br/>           AACCGATCAGAAGCCATGAAAGAGATGGTAAAAGCCTGT<br/>           GAAGAATATGGTTTCTTCAAAGTGATCAACCATGGCGTGC<br/>           CGCAGGGGATAATTTCTCAGGTGGAAGAAGAAGCCCGCG<br/>           GCTTCTTCGCCAAGCCCAGGCCCCGAAAAGATGCGGGCTG<br/>           GGCCCCCTATGGCTGCAAGAACATAGGCTTGCAGGGCG<br/>           ACGTCGGAGAAGTCAATATCTCATTCTCAAACCAACTC<br/>           CCCCTTCATAATTCCTACCGATGAATCCAATAAATTCAGGT<br/>           CAGCAATAAATGCGTATGTGGAAGCAGTGAGGAAGCTGG<br/>           CATGTGATATATTGGATCTATTGGTGAAGGAGTGTGCGG<br/>           GTCGGAGGGTGGATCGGCGTTGAGTAGGCTAATGAGAGA<br/>           CAGTGAGAATGACTCAATCCTAAGGTTGAATCACTACCCG<br/>           GCGGGCGACGTGAGCAAGATCGGGTTTGGCGAGCACACT<br/>           GACCCTCAGATCATCACCTCCTCCGATCCAACGGTGTGG</p>                                                                                                                                                                                                                                                                                                                                                                                                                                                                                                                                                                                                                                                                                                                                          |

|              |                             |                                                                                                                                                                                                                                                                                                                                                                                                                                                                                                                                                                                                                                                                                                                                                                                                                                                                                                                                                                                                                                                                     |
|--------------|-----------------------------|---------------------------------------------------------------------------------------------------------------------------------------------------------------------------------------------------------------------------------------------------------------------------------------------------------------------------------------------------------------------------------------------------------------------------------------------------------------------------------------------------------------------------------------------------------------------------------------------------------------------------------------------------------------------------------------------------------------------------------------------------------------------------------------------------------------------------------------------------------------------------------------------------------------------------------------------------------------------------------------------------------------------------------------------------------------------|
|              |                             | <p>AGGGCCTCCAGATCTCCGTCCAGGACGGCCTGTGGGTCC<br/> CGGTCAACCCCTACCCGGACTCTGCCTTCTGCGTCAATGT<br/> GGGCGACATCTTACAGGTAATGACGAATGGAAGGTTTGTG<br/> AGCGTGAAGCACAGAGTGGCGGTGCAAGCATAACGAATCA<br/> AGAATGTGCGATTGCGTACTTCGTTGCTCCGGCGCTGCATG<br/> CGACGGTGAGCTGCCTTCCGGGGCTGGGGCTGCCGCTC<br/> TACAGAAGCTTCACTTGGGGTGAATACAAGCAAGCTGTTT<br/> ATACAGGCAGGCTAGCCGATACCCGCCTCAATCTCTTTGC<br/> ATTGCCCTCTCATCACATAATTAA</p>                                                                                                                                                                                                                                                                                                                                                                                                                                                                                                                                                                                                                                                       |
| Sm2-<br>ODD3 | SMil_000<br>18100<br>99.66% | <p>ATGGTGAGTTCAGCAATGGCGACTACGATTGGGCCAAG<br/> GAAGTTAAAGAAATCGACGAAACAAAAGCCGGTGTGAAAG<br/> GTCTTGTCGATACCGGCATAACAAACATCCCCAAAATCTT<br/> CGTGATCCGAAGACCAGTTTCGAGACCCATCCTCCACCA<br/> CCCACACCCGCCACGGCTCCGATCTGCCGACGATCGAC<br/> TTCCAAGGGCTGCGGAGCGGCGGTGAAGGGCGGCGCGT<br/> GGTGGTGGAGGAAATCCGCAAGGCGGCTCAAGAGTGGG<br/> GGTTCTTCCGCATAGTGAACCACTCGATCCCAGTGGAGAC<br/> GATGGACGCCATGCTGGCGGCGGTGAAGCGCTTCCACGA<br/> GCTGCCCCACCACGAGAAGGCGGCGTTCTACACGACCGA<br/> CCAGAGGCGGAGCGTGAAGTTCAACAGCAATCTGCCGGA<br/> GCGAGAAAACGAGTTGGGTTGCTGGAGGGATATCCTGAG<br/> CTTCCTCTTCTACGATGACCAGCTGGAGCCCGAGGAGATA<br/> CCCTCTGCCTGCAGGGAGCAAGTGCAGGAATACGTGAAA<br/> CACGTGATCCAGCTGAGGGAGGTGATGGCGGAGCTGTTG<br/> TCGGAGGCGTTGGGGCTCCGCAGCGACTACCTTTCCAGC<br/> ATGGAGTGCATGAAAAGCGAGGCGCTGGCGTGTTTGTATT<br/> ATCCTAAATGTCCGGAGCCGCACAAGACCTTCGGAAACAA<br/> GTCGCATTCCGACACCACTTTCTTGACCTTACTCATGCAA<br/> GACACCATCGGCGGCCTCCAGATTCTTACGACGCTCAAT<br/> GGTCCACGTCCCTCCGGTTCGTGGGGCCCTCATAGCCA<br/> ATGTTGGTGTCTCTTGCAGATCATTAGCAATGACAAGTTC<br/> ATAAGCGTGGAGCACAGAGTGGTGGCG</p> |
| Sm2-<br>ODD4 | SMil_000<br>03886<br>100%   | <p>ATGTGGCATGAGGGCTTCACTATCATGGGCGGCTCCGCC<br/> GTGGAGCATGCCAAGCAACTTTGGCCTCATCACTATCACC<br/> ACTTTTGTGACGCAATGGACAAGTACCAAAGAAGATGAA<br/> ATCGGTAGCCTACAAAATCTTGCTCCTAATCCTCAAGGCTT<br/> TGGGTGTGGATGAAGAGGAATTAATTTTCATCGTCATCATC<br/> ATTTCTCATGTACCAATCCGACGGTGCATTGCAGCTGAAT<br/> TCTTACCCGAGCTGCCCGAACCCCTAGCCGGGCCATCGGG<br/> CTGGCCCCGCACACCGATTTCGTTACTACTGACGATCTTGC<br/> ATCAGAACGACACCGACGGCCTCAAATCTTGCAGGAAG<br/> GGGTCGGGTGGGTTCCGGTCCACCCATAACAGGGGCC<br/> CTGGTCGTCAACATAGGCGACCTGATGCACATTTTGTCCA<br/> ACGGGGAATTTCCCACTATGTGCCATCGTGTGTCGTCCTAA<br/> CGAGACGAGCCATAGATTTACCATGGCTTACTTCTATGGG<br/> CCCCGGCCGATTCCGTGGTGGCCCCGCTGCCTAATTTG<br/> CCTGGGCCACCACGGTTTCGGGCAGCCACGGTCAAGGAG<br/> TACATCGGCCTCAAGAACAAGCATCTTGAGAAGGCTCTTT<br/> CTTTAATCCAAATTTGA</p>                                                                                                                                                                                                                                                                                  |
| Sm2-<br>ODD5 | SMil_000<br>13745           | <p>ATGAGTTGGCAAACAGACATTCATCAGACCAACAATTTG<br/> AGCCATGGGAGAAGTAGATCCTGACTTCATTCAACCCCTC</p>                                                                                                                                                                                                                                                                                                                                                                                                                                                                                                                                                                                                                                                                                                                                                                                                                                                                                                                                                                        |

|              |                           |                                                                                                                                                                                                                                                                                                                                                                                                                                                                                                                                                                                                                                                                                                                                                                                                                                                                                                                                                                                                                                                                                                                                                                                                                                                     |
|--------------|---------------------------|-----------------------------------------------------------------------------------------------------------------------------------------------------------------------------------------------------------------------------------------------------------------------------------------------------------------------------------------------------------------------------------------------------------------------------------------------------------------------------------------------------------------------------------------------------------------------------------------------------------------------------------------------------------------------------------------------------------------------------------------------------------------------------------------------------------------------------------------------------------------------------------------------------------------------------------------------------------------------------------------------------------------------------------------------------------------------------------------------------------------------------------------------------------------------------------------------------------------------------------------------------|
|              | 96.26%                    | GAACACCAGCCTAAACCAGGAAGTGTTGAAGCCCCGAGGC<br>ATCCCATTCATCGACCTCTCCCCGCTGAACTCCCAAGAAC<br>CCGATGCAGCTGCCCTCGATCATCTAGTGTGCGGAGATAG<br>GTGATGCCTGCAAGATATGGGGCTTCTTTCAGATCATCAA<br>CCACGGGGTGCCTTACGAGTCCGTCAGAGAATTGAGAA<br>AGCATCAAAGAGTTCTTTGCTCTCCCAAGGAGGAGAAG<br>AGGAAGGCCAGCAGAGATGAGGCCAACCTCTTTGGCTAT<br>TCGGACTTTGAGATCACCAAGAGCGTCCGAGACTGGAAG<br>GAGATCTTCGACTGCACCATAGAGAATCCAACGGTCATAT<br>ACGCCTCAGATGAGCCCGATGACAAGGAGCTCAAAGAGC<br>TCACTAGTCAGTGGCCTCAGTATCCTCCAATTTAAGGGA<br>GATATGCCAAGAATATGCTGCAGAAATGCAGAAGCTAACT<br>CACAAAGCTACTAGAGCTGATAGCATTGAGCTTAGGCCTAA<br>AAAAAGATCGATTTTCATGGCTTCTTTAAAGAGCAGACGAG<br>CTTCATGAGGCTGAACTACTACCCATCCTGCCCTGCTCCA<br>CAACTAGCACTAGGGCTCGGGAGGCACAAGGATGCCGGT<br>GCCATGACAGTTCTGGCTCAAGACGACGTTGGAGGGCTT<br>GAGGTGAAGAGGAAGCCGGATGGGGAGTGGATCTTTGTC<br>AAACCTATGCCCGATGCTTATATTGTCAACGTGGGAGACC<br>TAATCCAGGTTTGGAGCAATGATAAGTAT                                                                                                                                                                                                                                                                                                                                                            |
|              |                           | ATGGTGGCTTCTTGCAACGTGGAGTTCGATTGGGCTAAAG<br>AAATTAAGGAATTCGACGAAACAAAAGCCGGCGTGAAGG<br>GTCTGGTGGATGCCGGAGTGAAGGAGATACCTCGTCTCT<br>TCGTGCATCCGCAGGAGGTGTTGGAGCGCCACCCGACGG<br>CCAAGGACGTGGCGGTGGAGCTGCCGGTGCATCGACTTGA<br>GCGGGGCAGAGCGTGGCGGAGCAAGGCGGAGGGAGGT<br>GGTGGAGGCGATCAGTAAGGCGGCAAGAGAATGGGGTTT<br>CTTCAGCATCGTGAAGCATGGGATTCCGTTGGAAACAATG<br>GATGCCATGTTGGAATGCATCAAGAGATTCCACGAGCTTC<br>CAAAGAGGAGAAGATTCCACTCTACACAACAGAGAGAAA<br>CAAGCCAGTGAATGGAACAGCAATCTTCTGCACAGCAA<br>AACGACCCTGCTTGTGGAGGGATGTGTTGAATATCGTAT<br>ACACAGATGATCATCTTGAAGACGAAGAGATTCTTTCAGT<br>GTGCAGGAAAGAATTGGAGGAGTATGTGAAGTACATGATC<br>CAAGTGAAGGAGTTGATGGCAGAGTTGATCTCAGAAGCG<br>CTGGGTCTCCCCGCCGACTACTTGTCCAAAATGGAGTGCA<br>TGAAAAGCCAGTCGCTTTCATGTTTGTATTACCCAGCTTGT<br>CCGGAGCCTCACAAAACCTTAGGAGCGCCAAAGCATTCC<br>GACACCACATTCTCACATTGCTCATCCAGGATAGGCTGG<br>GCGGTCTGCAGATGCTTCGTCACAATCAATGGTTTGATGT<br>CCCTCCTGTTTCGTGGGGCCCTCATTGCCAATTTTGGTGAT<br>CTCATGCAGATTCTTAGCAATGACGAGTTCATCAGCGTCG<br>AGCACAGAGTGCTGTGCGAGTCAGTGGGGCCCAGGATCT<br>CGGTCGCCACATTCTCCACGCCGAGCATCCGAGCCGCGG<br>GGAAGCCGTTTGGTCCGATCAAAGAGCTGCTGTCTCAAGA<br>CAAGCCAGCGGTGTATAGAGACTTCATGTTTGAAGAATAC<br>TTCCAATACTACAAAACCAAAGGGGCGCGCGTTGAATCCG<br>CCTTCGATTATTACAGGATTAATAAATAA |
| Sm2-<br>ODD6 | SMil_000<br>18081<br>100% |                                                                                                                                                                                                                                                                                                                                                                                                                                                                                                                                                                                                                                                                                                                                                                                                                                                                                                                                                                                                                                                                                                                                                                                                                                                     |
| Sm2-<br>ODD7 | SMil_000<br>29346<br>100% | ATGGTTGTGGAGAGCCTTGGACTAGAAAAGTACATGGATG<br>AGCACATGGATTCCACCAACTACCTCATTGACTCCAGAA<br>ATACGATAGGCCTCGAAGCCACGAGACTGAGCTAGGATTA                                                                                                                                                                                                                                                                                                                                                                                                                                                                                                                                                                                                                                                                                                                                                                                                                                                                                                                                                                                                                                                                                                                     |

---

TCATCCCACACCGACAAGAACATCGTAACAATCTTGTACC  
AGAATGAGATCAACGGATTGGAAGTCCTCACCAAAGATGG  
ACACTGGTTTACTTCTCAACCATCACCTAACTCTTTCGTGC  
TCATGATTGGAGAATCCTTTTCTGCATGGACAAACGGGAG  
GCTGCACGCTCCTTACCACAAGGTGATGATGAGCGGAGA  
CGAAGCTCGATACTCAATTGGATTGTTTTCGGTTCTAAAC  
CGGGTTACATGATAAAGGCTCCCGAAGAGATGGTGGATG  
AAGAACATCCTCTACTCTTCAACCCCTATGATCATCATCGC  
TTTCTTCAATTTTACTATAACCGAAGCTGGCCAGAAATCCCC  
AGCTGCTCTCAAAGAATATTGTGGACACTAG

---

Sm2-  
ODD8

SMil\_000  
24092  
98.79%

ATGGAAAATCATGCGTCAAAGTGGCACAACGTTGAATCTG  
TTCCAGAAACCCATATTTTCCCAGTGGAAGATAGAGCTGG  
CAACGAACCAATCCCTCTGTGTCACACAATCCCAATCATT  
GACCTTTCTAATTCACACGCACTTCACCAAATCATGCAAGC  
CAGCAAACAATATGGTTTCTTCCAGGTGAGGAATCACGGA  
GTGGGCGAGGATGTGATAGGCAATGCAGTAGAGGTGTTG  
GAGGAGCTATTTGGGCGGGAAAGTGAGGAAATCTCAAAG  
GAGGCTAAAGCAAACGGATGGGTGTATATGGGAAGCAGC  
AGTTTGGCCATAAAAGGTGCTCATTGTGGAGGGACAATA  
TCAAGCATCCATGCCACCCTTTGGAGGAGTCCATGCAACA  
TTGGCCCCACAACCCCACTCGATACAGACAAGTTGTGGCA  
AGGTACATAGAGGGAATAAGGGGGTTGAGTTTGAGAATTT  
TGAAGTTGATTTGTCAAGGATTAGGGCTTGAGAAGGGATA  
TCTTGGAGAGATGAGCCAAGTGCAGTTCCTCACAGCAAGC  
AACTACCCGGCCTGCCCCGACCCGGCTTTGACACTTGGG  
CTTCTCCCACATTTTGTATCACAGCCTCATCACAATATTATC  
TCAAGGAAATGCTCAAGGCCTTCAAGTCATGGTGAATGGA  
AAGTGGATGGGAGTTGAGGTTGTACCTAATGCCTTTGTAG  
TCAACATTGGCACCCAAATTCAGGTATATCCTTCAATTAAT  
TAA

---

Sm2-  
ODD9

SMil\_000  
18123  
99.45%

ATGGCACACAGCTGCAGTTTCTCAAACCTCATCAAATGATA  
GCTTTCATCAGCCCTTTGAGTTCAACTCATCGGTCCAAC  
CTTGGTAGATTCCGCGGATTTGAAAGCCCTACCGTCCGAAA  
TACAACCTCGAGGACACCGACGAAACGAGCGCCGCGAGC  
TGCGACTCGCTCCCGTTCATCGACTACTCCGCCCTCACCT  
CGGCCGATCCTGAGCGACGCTCCGAAGCCGTCGCTCAGC  
TGGCCGAAGCGTGCGCGGATTGGGGGTTCTTCGTCCTGG  
TGAATCATGGAGTGCCGGAGGCCTTGCTTGCTTCCCTATT  
CACGACGGTGAGAGAATTCTTCGCCTTGTCGACGACGA  
GAAGAAGCAGTACAAGGCGACGAGCACTTCGTCTCCGAT  
CGCCTGCGGCAACTTCAACGTGAAGAGCACTTCCAACCA  
GACATTCACCTTTGTGGAGGGATTTCTCAAGCTCTATGTG  
CACCTGATTTTCACTGCCCCACCAAACAGAACCCCTTAA  
GAGAGATTCTCGTTCGAGTACACGGAGAGAACCCGGAAAA  
TGGCTCGAGAACTGGTGGGAGCAGTAGGGGAATCCATGG  
GACTTGAGCGCAGCTATGTGGAGGAAGCTTTGGAGCTGG  
ATTCGAGCTTCCAAAAATTTGGTGGAACTTCTACCCGCC  
GTGCCCGGAGCCGGATCAAACGCTAGGGCTGCCGTCGCA  
TAACGATCCCGGTCTTTCACGATATTGATCATCCGCGAC  
GGGCTAGCCGGCTTGCAGATTCTGCGCAACGGCCAATGG  
TTTGAAGTCAATCCTCCTCCAATACTATGATCGTCAATTG

---

---

CGGCGACCAGCTTGAGATATTTAGCAACGGGAGATGCAA  
GAGCTCTCGGCATAGAGCGGTGGTGAACAAGGAGAGGGA  
GAGAATGTCGATCGCGGTGGGGAACGGCCCCGGCAAAG  
ATGTTGTGGTGGGGCCGGCCGCTCCGTTGGTCGCCAAGG  
ACGGCCGCGCCTTCTATCGTTCAATGAATTATCAACTA  
CGTCGAGTCTCAGCTCAGCCGAACCTTCAATGGAATATCA  
ATTCTTGATGAACAAAGGATATGA

---

Sm2-  
ODD10

SMil\_000  
04141  
99.09%

ATGATCTATGAATCAGAGAGCCCCTTAGAGCTCCCAGTTG  
TAGACGTTTCTGAGGCGTTGGATTCTTCATCACTGAGCTC  
CCTAGGCGCCGCCTGCCGAGAATGGGGTTTCTTCCAGAT  
CATCAACCATGGAATCTCGAAAGATCTCTACGCCAAAATC  
TACTCTCTCTACCAACATCTTCTCTCTCCCCTCCCAATC  
CAAGCTCAAACCTCGGCCCTTCTCGCACCTCAAGACCTAC  
ACGCCTCACTTCATCGCCTCTCCCTTCTTGGAGAGCCTCA  
GAGTTTCTGGCCCCGACTTCGCCGCCTCTGCGCAGAGCT  
CCGCAGCTGTCCTTGCTCACCACGATAATCAATTCAGTGA  
GATGATGCACGAATACGGGACAAAAATGTCGGAGTTGTGC  
AAGACGATCCTGAGGTTAATCCTGAAGACACTGGGGAGT  
GAAATCGAGTCGAAATATTACGAGTCTGAATTCCACCAAT  
GCCACGGGTACATGAGGATAAACAACACTACGCCTCCCCCG  
AGGGCTCGTGCATCGAGCCCTCGGGGTGGGGGAGGAG  
GAGGGGCTGGGCATGCACACGGACATGAGCTGCGTGAC  
GATCGTGTACCAGGACGAGATCGGGGGCCTGCAAGTGAG  
GTCCCGCGAGGGGCGATGGATGAGCATCGCCCTCGCG  
AGGGGACGCTCGTGGTGAACGTCGGGGACATGCTGCAG  
GCGTGGAGCAACGAGCGGCTGAGGTCGTCCGAGCACAG  
GGTGGTGTGCGGAGGAGGAAGGCCGCGGCCACGGCCG  
CGAGCCGCTTCTCGTTGGCCTTCTTCTGGTGCTTCGAGGA  
CGAGAAGGTGGTCGTGGCGCCGGACGACGTCGTGCGGG  
AGGCGGGGACGAGGATGTACGAGGCGTTTGTGTGCTCGG  
AATACTTGAAGTTTAGGGAGAGCGATGAGCGAGGGAGGT  
TTGACAAGGTTGGCTTTACTGTCAAGGATTTTGCAGGTGT  
TGCTAATGGGAGT

---

Sm2-  
ODD11

No hits

ATGGGGATTTTTTATGGTAATCAAACCTGCCTACACACACAC  
ACACACCATCTTAATAATATATTCTGATCGCCGGCGCTGT  
GCAGATCGAGAATCACGACGTCGATACGGAGCTGATGGA  
GAAGGTGAAGGCGCTGACCAAGGCTCACTACGAGCACAG  
CATGAAGCCCGGCTTCTCGACTCAGACGCCGCCAAGAG  
CCTCTCCGCCAACGAGTACGTTCCGGACATGGACTGGGA  
GAGCACCTTCTTCATCTGCCACCGCCCCGACAACACCATC  
AACGACATCGCCGCCCTCTCCAACACCTCAGGCAATCG  
ATGGACAAGTACATCGACCAGGTGATCGCGCTGGCCGAG  
AAGCTGTCAGAGCTGATGTGCGAGAATCTCGGGATCAGC  
AGGGCCACATGATGGAGGCATTCGCCGGGAGCCAGGG  
TCCCTCTGTGGGGACCAAGGTGGCGATGTATCCCGAGTG  
CCCGCACCCGGAGCTCATGAGAGGCCTCAGAGAGCACAC  
GGACGCGGGCGGGATCATACTCCTGCTCCAGGACGACCA  
GGTCCCGGGGCTGGAGTTCTTAAAGGCGGGGAATGGGT  
GAAAATCCCGCCTTCCAAGAACAACCGGATATTCGTCAAC  
ATCGGGGACCAGGTGGAGATAGTGAGCAACGGGTTGTAC  
AAGAGCGCGGTGCACAGAGTATGGCCATGAAGGAGGG

---

---

CAACCGCATCTCCGTCGCCACATTCTACAACCCCGGTGGA  
GACGCCGTCATTTCTCCGCTGCCGAGCTCCTGCTTCCGA  
GGGATATTCAGTTCAAGGATTATCTCAAGCTCTACACCAA  
GACGAAATTCGGGGACAAAGCCATCCGGTTTCAGTCCCTT  
AAAACGTCTATGGCGGCGGCTGAGAATTGA

---

Sm2-  
ODD12

SMil\_000  
26896  
99.67%

ATGGCGATTCCGGTGATTGATTTCTCGAAGACGGAAGGAG  
AGGAGAGGGTCAAGACGTTGGCTGAGATTGCTCATTGCT  
GTCAAGAGTGGGGATTCTTTCAGTTGGTGAATCATGGGAT  
CTCGGAGGAGCTCCTGGAGAGGGTGAAGAAGGTGGCGT  
CGGAATGCTACAAGGTGGAGAGGGAGGCCGGTTTCGAGG  
AGTCGGAAGTGGTGAAGAAGTTGAAGGAGAAGCAGAGTG  
ATGAGAGGATTGAAGATTTTGATTGGGAAGATGTGTTCTT  
GCTCACTGATCACAATGCTCAAGAATGGCCCTCCAAAAT  
GCTGGCTTCAAGGAGACCATGGAGGAGTACAGAAGCGAA  
CTGAAGAAACTGGCGATGAGAGTGATGGAAGCAATGGAT  
GAGAACTTGGGCCTCCCAAAGGGTACATGAAGAGGGCA  
TTCAACGGCGGAGAAGAAGAAGAAGCCTTTTTTCGGGACG  
AAGGTGAGCCACTACCCACCGTGCCCGGAGCCGGAGAG  
GGTGGCGGGGCTGCGGGCCACACGGATGCGGGTGGG  
GTGATACTGCTGTTCCAAGATGATGAGGTGGAGTCCCTCC  
AAATCTTGAAAGATGGAGAGTGGGTGGATGTGCAGCCTCT  
GAGAAACGCCATAGTCATCAACACAGGTGATCAGGTGGA  
GGTGCTCAGCAACGGCAGGTACAAGAGCGTCTGGCACCCG  
CATTCTCGCCACACCACACGGCAACAGAAGGTCCATTGCC  
TCCTTCTACAATCCCTCCACCACCGCCACCATTAGCCGG  
CCCCTCAGCTGCTCCTCGACGAGGTCCACCCAGAGTATC  
CCAGCTTCGTGTTTGGAGACTACATGTCTGTTTATGCTGA  
CCAGAAGTTTCTGCCTAAAGAGCCCAGGTTCCGAGCTGTC  
AAGGCACTGTAA

---

Sm2-  
ODD13

SMil\_000  
27988  
97.97%

ATGGAGATTCTTATGTCAAATTGGCTCGAGCCTGTGAAAG  
AAATACCTGAAAATACATATTTCCAGTTGATAAAAGGCCT  
GGTTCCAATGTTTTCCAGTGATGAACAACATTCTCTCAT  
CGATCTTCAAATCCCAATCGCCCAAAATGATTCAAGAG  
ATCTTTGATGCAAGCCAAGAATTTGGAATCTTTCAGGTGAT  
CAACCATGGGGTTCCGGCGAGCCTAATGGAGGAGACGAT  
GAAGACGATGAAGGGATTCTTCGCGACGACGCCGGAGCA  
CAAGGCCAGCTTCTACTCCTCAGATATCACAAAGAAATGC  
AGAATTTACTCTAGCACCTTGAATTACCACTCTGAAGATGT  
CCATTATTGGAGAGATAATTTCACTCACCATTGCCATCCTC  
TTCAACATCACATTCACCTCTGGCCCCATAACCCCTTCCAAT  
TATAGAGAAGTTGTGGGAGCATATTCAATTGAGACAAGGA  
AGCTGATGCTGAGGATTCTAGAAGCGATATCGGAAGGGC  
TAGGGCTAAAACCTAAATATTTTCGATGGTGAGATTAGCAAA  
ACACAGCTGCTATCAGTGAATCATCACATCCCATGCCCTA  
ATCCGAGCCTCACGCTCGGGATGCCGCCGCACACCGATC  
CAAACCTTATACCATATTGCAGCAGTGCTCCGTCCCGGG  
CCTCCAAGTCTCCGCGACCACCACTGGATAGACGTTGA  
GCCCAACCCCGCCGCGTTCCTCGTCATCCCTGGCCTCCA  
ACTCAAGGTGATAAGCAATGGGAGATTTTCGAGCCCGGTT  
CATAGAGTGGTGACGCATTTCGCGAGAGGCGAGGACGACG  
ATCGGGACGTTCTTGATTCCGTCGCCGGAGATCCTTATTG

---

---

AGCCGGCGGAGGACTACGCCGGCGACCGCCCCGTCTAC  
AAAGGCTTCACTTATGAAGAGTTTTTTCAGCTGCTTCACTGG  
GAGCAACTGTGAAGCTGATGCTGCACTCGCCTTCTTCAA  
AATGAGACCAATTCAAAATCAACAATGTTGCTCTAA

---

Sm2-  
ODD14

SMil\_000  
18668  
96.92%

ATGGCCACATCCAGCTTGAAAAATTGCTCGCAAGAAAACG  
AGGCCGATCGCGTGCACGAGCTGAACGCTTTCGAGGCCA  
CAAAAGCCGGCGTGAAGGGGCTCACCGACTCCGGCGTCC  
AGAAGGTTCCGAGAATGTTTCATCAGGCCAGCCGACGAGC  
TCGTGAGGAGCGCAACCGGAGCCGCTCCCCGCTGCAA  
GCTCCGGTGATAGACCTCGGCCGGATCGGGGAGGGCGA  
GGGGCGGGAGAAGGCCGTGAGCGAGGTGAGATGGGCGT  
CGAAGGAGCTCGGGATCTTCCAGATCGTGAACCACGGGG  
TGGCCGTGGAGGTCATGGACGCGATGATCGACGGCGTGA  
GGAAGTTTACGAGCAAGATGCGGAGGCGAAGAAGCAGT  
TCCACACGCGCGACGCCATGCGCAAGGTGATGTACGCGA  
GCAACGTCGATCTGTACAAGTCGCGCGCCGCGAATTGGA  
GGGACACGTTCTCGGTGCGCGCTCATGGGTTTCGGACCGCG  
TTGAGCCGGAAGAGTTGCCGGAGATTTGCAGAGACTCAA  
CAATCAAGTATCTTGATGAAGTCACGAATCTCGCACACAC  
TCTATTTGAGCTGCTCTCGGAAGCTCTTGGGCTCGAACAA  
GGTTGCCTAGGAGCCTTGAAATGTGGCCGAGGACGCACG  
TTCGTGCGCCAGTACTACCCCGCGTGCCCCGAGCCGGAG  
CTCACGATGGGCATGACCAACCACACCGATCCTTGTTC  
TAACTATTCTTCTCCAAGATCAAATCGGAGGCCTCCAAGC  
TCTGCACAATAGTCAGTACATAAATGTGGAGCCTCTGCCT  
GCTAGCTTCGTGTCACATTGGAGATATGTTGCAGATTG  
TGACAAATGATGAGTTCATAAGCCCAATTCATAGAGTCCA  
CGCAAATCGGGCCGGGCCAAGAATCTCGGTTGCGGGCTT  
TTTACCCGGTGATGCTATTTTCAGGGACAATATATGGCCCG  
ATCAAAGAGTTGGTATCAGAGAACAATCGGGCTCGATACA  
AAGAGTTCACAGTGGGAGAGTACATGTCCAAGTTTTTGA  
GCGGCCAATTGATAAATCTGGTCTTGATGAATGGAGATTG  
CAAGATGAAGACAATGTCTAA

---

Sm2-  
ODD15

SMil\_000  
19092  
96.44%

ATGGCCGGAGAATCTTATCACTTGGGTTTTCAAAGTGAAA  
TTGACAAGGATGAGCAGCGAAGCATAACCACTCACTGTTCC  
TTTGGCTACAGAAATTCGGTTCATCGACCTCCGCCGATTG  
CTTGCCGCCTCCACCGATGCCAACCTCTCCGACCTCCGC  
TCCGCTCTCAGCTCCTGGGGTTGCTTTCAGGTAGTAAATC  
ATGGCATTGAAAGCTCTCTACTAGATGAGGTGCGCAGCAT  
CAGCAGAGAATTCTTTCAGCTGCCCATGAGCGAGAAGCA  
GATATACGCCGGCGAGGAAGAAGGCTACAAAATCGACCA  
ACTGGTCACCGACGACCAATTTCCCGACTGGTCCCACAAC  
TTACGCCTCCGTATCTTTCAGAAAGATCGCCGAAAACCCA  
AATATTGGCCTCAAAATCCCGATTCTTTCAGAAAGGTGGT  
GGTGAATACGGTGATAAGTTGAGAGGGGTGGCAGAAGA  
AATACTGAAATTAACGGGCAAGTCATTGAAGCTAGGTGAT  
GAGGAGAGTTTTGTGAAGAAAACGAGCGGAATGTACGCA  
CAATTCACTACTACCCTCCATGTCCGAATCCCGACCGAG  
TTCTGGGATTGAGACAACATTCTGATTTTTTCGATGATAACC  
ATTCTGCTGCAAGACGATCAAGTCCAAGGCCTTCAGCTGC  
TCAAAGACGACAACCTGGTTTGCAGCTCCTACAATGCCTCA

---



---

CGCGCTCCTCGTTTTGCTGGGGATCAACTCCAGGTACG  
CACCATCCAGATTAATTA

---

Sm2-  
ODD16      No hits

ATGAAAGCAATCAGGCTCTCTGTTTACTCAAGCAAGTGTC  
GTCTTGACAAATTTACAAATCAACGGCCGTCTTTAAATAAT  
CCAAAAAATTATTTGAAGAATTTAAGAAGCGAGGACCTTT  
TCATTATTTACAATTTTGTATTGGAAGTTAGGAGATTTAAA  
ACAAGCTGTCAAGTCAGCCTTTACATTTTTGGTGGCCAAT  
CCGGGGGATGATGATACTTTGAATAATTTACATTTTTATAT  
GGAACAGTCTGGATTTGAGCGAGAAATGCTTATTGATGAA  
TGGCAATATCGTCATGAGAAATTTATATGAAGGCCGTAAA  
TGCTTATAGCCATCAAGAATGGCTATATTGTGTTAATTTAT  
TTCAAGAATCTTTACAACAATTTGGGAAGCTTTGGAAGAC  
TGCAGATCAGAATGTGAATATTTAAACAACAAGAGGAAAT  
TAATGGCGGGGATGAACAAAATGAGTGGAGTGTTTTTATT  
ACAACAACCTTATCTTTCTGTTTTACAATGCAAACAAGTTG  
TGTCTCTCAACAAAGTTTTCTCAATGGTCGTTTTACAAAAC  
ATTTGTTGCTTTCACATTATGAACATTTACACCTTTGCCAAT  
TTAATTTAAAACGTGGAAGAGAAGCTTGTCAATCTGTGGAA  
AATGCTTTACTTCAACCTAAAAATATTGTGATGAGAAG  
AAATAAATTATTTATTTAAATTATTTAATGGAATGTTGA  
GAATGATGTTTCTTTGTTTCAACCTAGCAAGGAAATTA  
ATTTGTGAGACGTGAGAAAATGGAACGTCAATTTTTACAA  
TTTTTAGAAAAGGAAATGAATGAAGAATTTACTTTCTTCT  
TCACCTATTGGAAAAATACAATTCCCCTTAATTCTGATGA  
CAACTTAATTGATCAATTTAATTATTCCAAAATATTACAAA  
TCAGCTTATTTACAATCATCAGAATGTTTATTTTTACGTT  
TGCAGCAGATTTCTCCCTCATCATTTCCCTCTTTTTCAAC  
AACTTTAATTAATGAATTTTTGCTTAGAATTTCTCACTTT  
ATGAAATTGAAGAAAACCAATTTTTGAGGGAATTTATTGT  
GTTTCTAAAGGTTTATTTGGAAAAGTAATTGTGAACGTC  
ACAATTTCTGTGTCAATAAATAATTTAATTGTGGTCAAA  
GGGAGGGGAAGAATTTACTGGATGTGTAATTGTATTTGT  
GAAGTGTA

---

Sm2-  
ODD17      SMil\_000  
12259  
100%

ATGGAATCAAAGGCGCAGATATTAGGCAGATCACTGAAGG  
TGCCAATTGTGCAAGAAGCTTCAAAGGAGAACTGAGCAG  
TGTGCCGTGAGATACATCCGACCCGATCACCAACATCTC  
ACCGCCGCCGATGTTTCTCCCTACCTCAAATCCCCGTCA  
TCGATATGCAGAAGCTGCTCCTCTCAGATTCCATGGATTC  
CGAGCTTACAGGCTGCACGAAGCTTGCCTAGATTGGGG  
TTTCTTCCAGTTGATCAACCACGGCGTGGATGCGGCGCC  
CATAGCCAAAATGAGGTCGGAAATGACGGCGTTCTTCAAC  
CTCCCGCCGGAAGAGAAGGACGTATTCCGGCAGAAGGAA  
GATGACGTGGAAGGCTACGGCCAAGCCTTCGTCACATCC  
CAAGAGCAGAAGCTCGATTGGGCGGATTTATTTTTCGTCC  
TCACTTCGCCTCCTTATTTGAGAAAGCCTCACCTAATCCC  
AAGCTTCTGCTTCGTTCAAGAGATGCCATAGATGAGTATG  
GAGCAGATCTAAGGAAGCTAGCGATGAAGATCTTAGGTTA  
CATGGCGAAAGCACTAGGCATGAAGGGCGAAGAGATGAG  
GTCGGCGTTTGTGAAGGGACGCAGGCGATGAGGATGAA  
TTACTATCCGCCATGCCCGCAGCCGGAGCTGGTGACAGG  
CCTCTGCCCCATTCCGACGCAGTCGCCCTCACCATTCTG

---

---

CTCCAGGTTAACGACATCTCAGGCCTCCAGGTCAGCAAAG  
ATGGCAAATGGATTCCCGTTACTCCACTCCCTCATGCATTT  
GTCATCAATGTTGGCGACATATTGGAGATTATGAGCAATG  
GCGCTTACCGCAGCGTTGAGCATCGGGCGACTGTGCACA  
GCGAGAAAGAGCGGTTGTCCATCGCCACCTTCCTCAGCA  
CCAGGCTGGATGGCGATATAGGTCCGGCGCCAAGCCTCG  
TTGGCCCCGAAACTCCGGCGAAATTCAAGACGATCAGCG  
CGGTTGAATATGTCACGGGTTTGTGGCAAAGGAGCTCAA  
GGGTAAGTCGTATGTGGACCTCATGAGGATTCAGAATTAG  
ATGGCCACCGCTGTTGTGAGTGCCGTCCAAGAACTATCC  
GGCGCCGTGAGCAGCCCCGCCGGAGAAATACCTACTGAAA  
GACGGGATCGGCGGCCCCGAGTTCCCGGTTCTCGCAGTT  
CCCGCCATTGATCTCACTCTTCTCTCTGCATCATCTCCTCA  
AGGGGAAAGGGAGCTGGAGAAGCTCAAGCTTGCTTTCAG  
CTCTTGTGTTATATTCAGGTGGTGAATCATGGCATGGAT  
GACGCCTTCTTGGACGAGGTGCATGGCGTGACCAAGGAG  
TTCTTCTCACTCCCAATGGAAGAGAAGATGAAAAGCGCGA  
GGCCCAAAGATGATATTGATGGCTATGGGAATGACACTGT  
TACTCAGACACCCAACTCTTGATTGGAATGATAGTTGT  
ACCTTAATGTCAAACCTGATTCTAGCAGAAAACCTCAAAGTA  
TGGCCACAAAATCCAGTAATTTTAGGAAAGTATTATTGGA  
GTTACAGCGGAGCTGGAAAAGCTGAATGAGGCGATATT  
GAGGGCGATGGCGAAGTCCCTAAAAGTGGAGGAGGAGTG  
CTTTATAAAGCAGATGGGGGAGGATGAGACGGTGCTTTC  
GCGGTTCAATCTGTATCCGCCGTGCCCGCGGCCGGACGC  
GGTGCTGGCCGCCAAAGCGCACGGCGACGCCTCCGCCA  
TGACGTACCTCTTGCAGGATAACAAAGTGAAGGGCTTCA  
AACTCTGAAAGACGGCGTCTGGTACAGAGTTCCCATCATT  
CATAATGCTATCGTCGTCAACGTTGGTGATCAACTCGAGA  
TAATGAGTAATGGAATATTCGAGAGCCCGATACACAGAGT  
TGTGACAAATCCAGAGAAAGAGAGGATTACCATAGCAATT  
TTCTTCAGCCCTGACCCAACCAGCGAAGTTGGGCCTCATG  
AAGGACTAATTAATGAAAAGAGGCCCAAATTATTCAAGAGT  
GTTGTTGATTACACTGGTAACTATTTCCAGTCTTTTCAGAC  
AGGGAAAAGGCCATTGACCTTCTCAGACTTTAA

---

Sm2-  
ODD18

SMil\_000  
24282  
99.71%

**Supplemental Table S3** Protein sequences information for the phylogenetic tree.

| Enzyme abbreviation | Accession ID   | Species                      |
|---------------------|----------------|------------------------------|
| AcF3H               | ABG78792.1     | <i>Aethusa cynapium</i>      |
| AcFNS               | ABG78791.1     | <i>Aethusa cynapium</i>      |
| AcANS               | ABM66367.1     | <i>Allium cepa</i>           |
| AmF3H               | AAX21539.1     | <i>Ammi majus</i>            |
| AgF3H               | AAX21540.1     | <i>Anethum graveolens</i>    |
| AaFNS               | ABG78793.1     | <i>Angelica archangelica</i> |
| AaH6H               | ABM74185.1     | <i>Anisodus acutangulus</i>  |
| AtaH6H              | AAQ75700.1     | <i>Anisodus tanguticus</i>   |
| AgFNS               | AAX21537.1     | <i>Apium graveolens</i>      |
| AtACO1              | NP_179549.1    | <i>Arabidopsis thaliana</i>  |
| AtACO2              | NP_176428.1    | <i>Arabidopsis thaliana</i>  |
| AtACO3              | NP_172665.1    | <i>Arabidopsis thaliana</i>  |
| AtACO4              | NP_171994.1    | <i>Arabidopsis thaliana</i>  |
| AtACO5              | NP_565154.1    | <i>Arabidopsis thaliana</i>  |
| AtAOP1              | NP_192216.1_1  | <i>Arabidopsis thaliana</i>  |
| AtAOP2              | AAL14646.1_1   | <i>Arabidopsis thaliana</i>  |
| AtAOP3              | AAL14647.1_1   | <i>Arabidopsis thaliana</i>  |
| AtF3H               | AEE78766.1     | <i>Arabidopsis thaliana</i>  |
| AtF6H1              | NP_187970.1    | <i>Arabidopsis thaliana</i>  |
| AtF6H2              | NP_175925.1    | <i>Arabidopsis thaliana</i>  |
| AtFLS1              | NP_196481.1    | <i>Arabidopsis thaliana</i>  |
| AtFLS3              | NP_201164.1    | <i>Arabidopsis thaliana</i>  |
| AtFLS5              | NP_001032131.1 | <i>Arabidopsis thaliana</i>  |
| AtGA20ox1           | NP_194272.1    | <i>Arabidopsis thaliana</i>  |
| AtGA20ox2           | NP_199994.1    | <i>Arabidopsis thaliana</i>  |
| AtGA20ox3           | NP_196337.1    | <i>Arabidopsis thaliana</i>  |
| AtGA20ox4           | NP_176294.1    | <i>Arabidopsis thaliana</i>  |
| AtGA20ox5           | NP_175075.1    | <i>Arabidopsis thaliana</i>  |
| AtGA2ox1            | NP_177965.1    | <i>Arabidopsis thaliana</i>  |
| AtGA2ox2            | NP_174296.1    | <i>Arabidopsis thaliana</i>  |
| AtGA2ox3            | NP_181002.1    | <i>Arabidopsis thaliana</i>  |
| AtGA2ox4            | NP_175233.1    | <i>Arabidopsis thaliana</i>  |
| AtGA2ox6            | NP_171742.1    | <i>Arabidopsis thaliana</i>  |
| AtGA2ox7            | AEE32606.1     | <i>Arabidopsis thaliana</i>  |
| AtGA2ox8            | NP_193852.2    | <i>Arabidopsis thaliana</i>  |
| AtGA3ox1            | NP_173008.1    | <i>Arabidopsis thaliana</i>  |
| AtGA3ox2            | NP_178150.1    | <i>Arabidopsis thaliana</i>  |
| AtGA3ox3            | NP_193900.1    | <i>Arabidopsis thaliana</i>  |
| AtGA3ox4            | NP_178149.1    | <i>Arabidopsis thaliana</i>  |
| AtGSLOH             | NP_180115.1    | <i>Arabidopsis thaliana</i>  |
| AtLDOX              | NP_194019.1    | <i>Arabidopsis thaliana</i>  |
| AtS3H               | NP_192788.1    | <i>Arabidopsis thaliana</i>  |
| AtJOX1              | NP_187728.1    | <i>Arabidopsis thaliana</i>  |
| AtJOX2              | Q9FFF6.1       | <i>Arabidopsis thaliana</i>  |
| AtJOX3              | Q9LY48.1       | <i>Arabidopsis thaliana</i>  |
| AtJOX4              | AEC09512.1     | <i>Arabidopsis thaliana</i>  |
| AbH6H               | ABR15749.1     | <i>Atropa baetica</i>        |
| BcH6H               | ACB40931.1     | <i>Brugmansia candida</i>    |
| CrD4H               | AAB97311.1     | <i>Catharanthus roseus</i>   |
| CIC2H               | AER36089.1     | <i>Citrus limetta</i>        |
| CitFLS              | BAA36554.1     | <i>Citrus unshiu</i>         |

---

|              |                |                                                  |
|--------------|----------------|--------------------------------------------------|
| CmFNS        | AAX21538.1     | <i>Conium maculatum</i>                          |
| CcFNSI/F2H   | QEP99660.1     | <i>Conocephalum conicum</i>                      |
| CjFNSI/F2H   | QEP99661.1     | <i>Conocephalum japonicum</i>                    |
| CjFNSI1      | QEP99662.1     | <i>Conocephalum japonicum</i>                    |
| CjNCS        | BAF45337.1     | <i>Coptis japonica</i>                           |
| CmGA20ox     | AAB64345       | <i>Cucurbita maxima</i>                          |
| CmGA7ox      | AAB64346       | <i>Cucurbita maxima</i>                          |
| CcFNS        | ABG78790.1     | <i>Cuminum cyminum</i>                           |
| DmH6H        | AAQ04302.1     | <i>Datura metel</i>                              |
| DcFNS        | AAX21536.1     | <i>Daucus carota</i>                             |
| FaANS        | AAU12368.1     | <i>Fragaria x ananassa</i>                       |
| FaF3H        | AAU04791.1     | <i>Fragaria x ananassa</i>                       |
| FaFLS        | AAZ78661.1     | <i>Fragaria x ananassa</i>                       |
| GbANS        | ACC66092.1     | <i>Ginkgo biloba</i>                             |
| GbF3H        | AAU93347.1     | <i>Ginkgo biloba</i>                             |
| GbFLS        | ACY00393.1     | <i>Ginkgo biloba</i>                             |
| GmF3H        | AAT94365.1     | <i>Glycine max flavanone</i>                     |
| HvIDS2       | BAA03647.1     | <i>Hordeum vulgare</i>                           |
| HvIDS3       | BAA75493.1     | <i>Hordeum vulgare</i>                           |
| HnH6H        | AAA33387.1     | <i>Hyoscyamus niger</i>                          |
| IbC2H        | BAL22346.1     | <i>Ipomoea batatas</i>                           |
| IbF6H1       | BAL22344.1     | <i>Ipomoea batatas</i>                           |
| InANS        | BAB71811.1     | <i>Ipomoea nil</i>                               |
| MdACO1       | Q00985.1       | <i>Malus domestica Borkh.cv. Golden deliciou</i> |
| MeFNSI1      | QEP99659.1     | <i>Marchantia emarginata</i>                     |
| MpaFNSI1     | QEP99658.1     | <i>Marchantia paleacea</i>                       |
| MtF3H        | ACR15123.1     | <i>Medicago truncatula</i>                       |
| McDAH        | QJD15033.1     | <i>Menispermum canadense</i>                     |
| NB17FLS      | BAC10995.1     | <i>Nierembergia sp.</i>                          |
| OsANS        | CAA69252.1     | <i>Oryza sativa</i>                              |
| OsDAO        | NP_001053075.1 | <i>Oryza sativa</i>                              |
| PsCOD        | ADD85331.1     | <i>Papaver somniferum</i>                        |
| PsT6OD       | ADD85329.1     | <i>Papaver somniferum</i>                        |
| PfANS        | BAA20143.1     | <i>Perilla frutescens</i>                        |
| PcF3H        | AAP57394.1     | <i>Petroselinum crispum</i>                      |
| PcFLS        | AAP57395.1     | <i>Petroselinum crispum</i>                      |
| PcFNS        | AAP57393.1     | <i>Petroselinum crispum</i>                      |
| PhF3H        | AAC49929.1     | <i>Petunia hybrida</i>                           |
| PhFLS        | CAA80264.1     | <i>Petunia hybrida</i>                           |
| PpFNSI1/F3H  | XP_001780809.1 | <i>Physcomitrella patens</i>                     |
| PpFNSI2/F3H  | XP_001781297.1 | <i>Physcomitrella patens</i>                     |
| PpFNSI3/F3H  | XP_001785619.1 | <i>Physcomitrella patens</i>                     |
| PaANS        | BAE54521.1     | <i>Phytolacca americana</i>                      |
| PaF3H        | AAX21535.1     | <i>Pimpinella anisum</i>                         |
| PaFNSI1      | MK557763       | <i>Plagiochasma appendiculatum</i>               |
| RsGRS1       | BAW81934.1     | <i>Raphanus sativus</i>                          |
| RhFLS        | BAC66468.1     | <i>Rosa hybrida</i>                              |
| SmACO        | AFJ75398.1     | <i>Salvia miltiorrhiza</i>                       |
| SemFNSI1/F3H | XP_002985262.1 | <i>Selaginella moellendorffii</i>                |
| SemFNSI2/F3H | XP_002967867.1 | <i>Selaginella moellendorffii</i>                |
| SemFNSI3/F3H | XP_002963905.1 | <i>Selaginella moellendorffii</i>                |
| SemFNSI4/F3H | XP_002963353.1 | <i>Selaginella moellendorffii</i>                |
| SemFNSI5/F3H | XP_002965940.1 | <i>Selaginella moellendorffii</i>                |

---

---

|              |                |                                   |
|--------------|----------------|-----------------------------------|
| SemFNSI6/F3H | XP_002965430.1 | <i>Selaginella moellendorffii</i> |
| SemGA20ox    | ABX10768.1     | <i>Selaginella moellendorffii</i> |
| SemGA3ox     | ABX10776.1     | <i>Selaginella moellendorffii</i> |
| SacDAH       | QJD15032.1     | <i>Sinomenium acutum</i>          |
| SI16DOX      | BBD17782.1     | <i>Solanum lycopersicum</i>       |
| SIACO1       | NP_001234024.2 | <i>Solanum lycopersicum</i>       |
| St16DOX      | BBD17781.1     | <i>Solanum lycopersicum</i>       |
| SoANS        | BAE54520.1     | <i>Spinacia oleracea</i>          |
| SoGA2ox3     | AAX14674.1     | <i>Spinacia oleracea</i>          |
| ZmA2         | CAA39022.1     | <i>Zea mays</i>                   |
| ZmBX6        | NP_001105100.1 | <i>Zea mays</i>                   |

---

**Supplemental Table S4** List of oligonucleotide primer sequences.

|                     |                                                              |
|---------------------|--------------------------------------------------------------|
| 2ODD7-BamHI-F       | CGGGATCCATGGTTGTGGAGAGCCTTGG                                 |
| 2ODD7-NotI-R        | ATAAGAATGCGGCCGCCTAGTGTCCACAATATTCTT                         |
| 2ODD8-BamHI-F       | CGGGATCCATGGAAAATCATGCGTCAA                                  |
| 2ODD8-NotI-R        | ATAAGAATGCGGCCGCTTAATTAATTGAAGGATATA                         |
| 2ODD14-BamHI-F      | CGGGATCCATGGCCACATCCAGCTTGAA                                 |
| 2ODD14-NotI-R       | ATAAGAATGCGGCCGCTTAGACATTGTCTTCATCTT                         |
| 2ODD16-BamHI-F      | CGGGATCCATGAAAGCAATCAGGCTCTC                                 |
| 2ODD16-NotI-R       | ATAAGAATGCGGCCGCTTACACTTCACAAAATACAA                         |
| 2ODD17-BamHI-F      | CGGGATCCATGGAATCAAAGGCGCAGAT                                 |
| 2ODD17-NotI-R       | ATAAGAATGCGGCCGCCTAATTCTGAATCCTCATGA                         |
| 2ODD18-BamHI-F      | CGGGATCCATGGCCACCGCTGTTGTGAG                                 |
| 2ODD18-NotI-R       | ATAAGAATGCGGCCGCTTAAAGTCTGAGAAGGTCAA                         |
| SmT II AS-RNAi-F    | GGGGACAAGTTTGTACAAAAAAGCAGGCTTCAAGATGCGGAGGC<br>GAAGAAGCAGTT |
| SmT II AS-RNAi-R    | GGGGACCACTTTGTACAAGAAAGCTGGGTTTTGGAGAAGAATAGT<br>TAGGAAACAA  |
| qRTSmActin-F        | CTGACAGGATGAGCAAGGAG                                         |
| qRTSmActin-R        | GCGAACGAAGAGTTTGATTT                                         |
| qRTSmT II AS-F      | ACCGATCCTTGTTTCCTAAC                                         |
| qRTSmT II AS-R      | CCGATTTGCGTGGACTCTAT                                         |
| SmeiT II AS-BamHI-F | CGGGATCCATGGCCACATCCAGCTTGAAAAATT                            |
| SmeiTIIAS-NotI-R    | ATAAGAATGCGGCCGCTTAGACATTGTCTTCATCTTGCAAT                    |
| SbowTIIAS-BamHI-F   | CGGGATCCATGCAGGAAGACGATCGCGTGAAGG                            |
| SbowTIIAS-NotI-R    | ATAAGAATGCGGCCGCTTAGACATTGTCTTCATCTTGCAAT                    |
| StriTIIAS-BamHI-F   | CGGGATCCATGGCGGCAGACGATCGCGTGGAGG                            |
| StriTIIAS-NotI-R    | ATAAGAATGCGGCCGCTTAGACATTGTCTTCATCTTGCAAC                    |
| Sm-N144D-2F         | GTACGCGAGCGACGTCGATCTGT                                      |
| Sm-N144D-1R         | ACAGATCGACGTCGCTCGCGTAC                                      |
| Sm-L147A-2F         | CAACGTCGATGCGTACAAGTCGC                                      |
| Sm-L147A-1R         | GCGACTTGTACGCATCGACGTTG                                      |
| Sm-R156W-2F         | CGCGAATTGGTGGGACACGTTCT                                      |
| Sm-R156W-1R         | AGAACGTGTCCCACCAATTCGCG                                      |
| Sm-P245M-2F         | CCACACCGATATGTGTTTCCTAA                                      |
| Sm-P245M-1R         | TTAGGAAACACATATCGGTGTGG                                      |
| Sm-F314W-2F         | GGTTGCGGGCTGGTTCACCGGTG                                      |
| Sm-F314W-1R         | CACCGGTGAACCAGCCCGCAACC                                      |
| Sm-F352A-2F         | CATGTCCAAGGCTTTAGAGCGGC                                      |
| Sm-F352A-1R         | GCCGCTCTAAAGCCTTGGACATG                                      |
